# Supplementary material for: Characteristics of Intestinal Microbiota in Japanese Patients with Mild Cognitive Impairment and a Risk-Estimating Method for the Disorder
Source: MDPI journal article supplement (doi:10.3390/biomedicines11071789), 2023-06-22
Supplement: s1 [file s1]

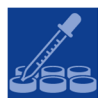

# Characteristics of Intestinal Microbiota in Japanese Patients with Mild Cognitive Impairment and a Risk-Estimating Method for the Disorder

Kouta Hatayama <sup>1,\*</sup>, Aya Ebara <sup>1</sup>, Kana Okuma <sup>1</sup>, Hidetaka Tokuno <sup>1</sup>, Kazumi Hasuko <sup>1</sup>, Hiroaki Masuyama <sup>1</sup>, Iyoko Ashikari <sup>2</sup>, and Takuji Shirasawa <sup>3</sup>

<sup>1</sup> Symbiosis Solutions Inc., Tokyo 101-0064, Japan

<sup>2</sup> Ashikari Clinic, Tokyo 164-0011, Japan

<sup>3</sup> Ochanomizu Health and Longevity Clinic, Tokyo 101-0062, Japan

\* Correspondence: hatayama@symbiosis-solutions.co.jp; Tel.: +81-3-6275-0878

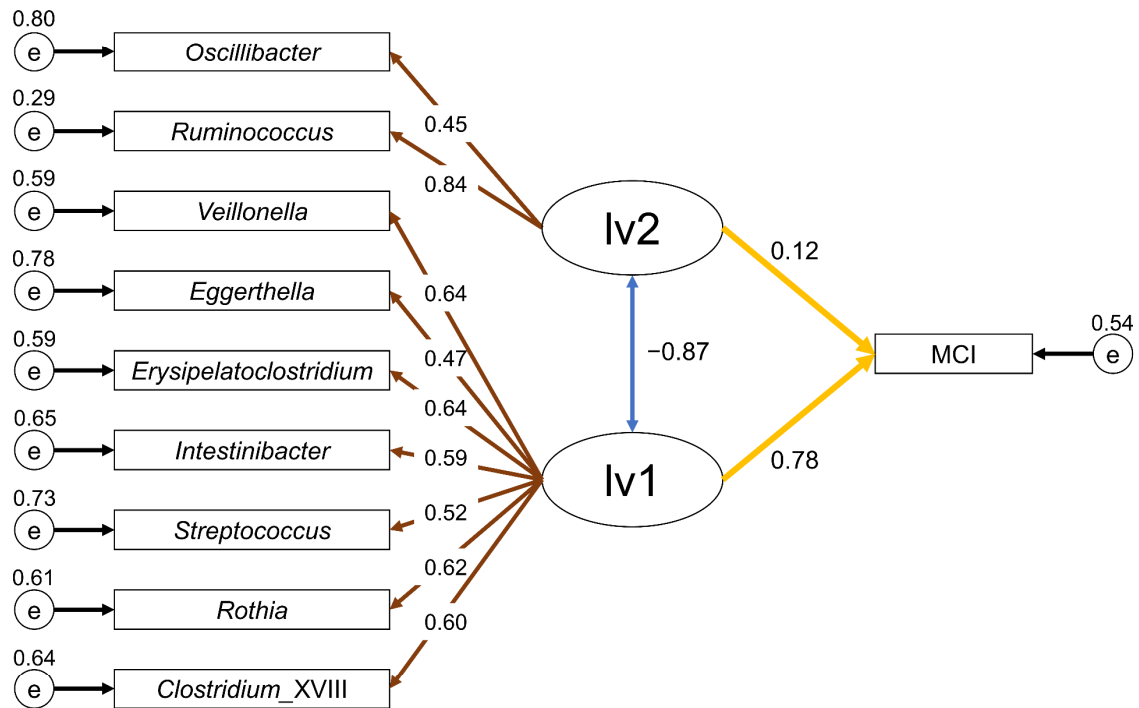

**Supplementary Figure S1.** Constructed structural equation model for males and its values for each parameter. Ellipse (*lv1* or *lv2*), rectangle (MCI or taxa name) and circle (e) represent latent variables, observed variables, and residual terms, respectively. The values in the small circles, double-headed blue arrow, brown arrow, and yellow arrow represent residual variance, correlation coefficient, loading value, and path coefficient, respectively. The goodness-of-fit indices of the SEM were goodness-of-fit index (GFI) = 0.94, adjusted GFI (AGFI) = 0.88, and the root mean square error of approximation (RMSEA) = < 0.01. The detailed results are shown in Supplementary Table S4.

**Supplementary Table S1.** Exiting diseases in patients with MCI.

| <b>Disease</b>                 | <b>Male (n)</b> | <b>Female (n)</b> |
|--------------------------------|-----------------|-------------------|
| Arrhythmia                     | 1               | 0                 |
| Arthralgia                     | 0               | 1                 |
| Benign prostatic hyperplasia   | 1               | 0                 |
| Cataract                       | 2               | 2                 |
| Cerebrovascular disease        | 1               | 0                 |
| Chronic gastritis              | 0               | 1                 |
| Chronic kidney disease         | 2               | 0                 |
| Constipation                   | 1               | 4                 |
| Diseases of circulatory system | 1               | 0                 |
| Dyslipidemia                   | 2               | 2                 |
| Gout                           | 1               | 0                 |
| Hashimoto's thyroiditis        | 1               | 1                 |
| Hypertension                   | 4               | 4                 |
| Hypothyroidism                 | 0               | 1                 |
| liver cirrhosis                | 1               | 0                 |
| Low back pain                  | 1               | 1                 |
| Malaise and fatigue            | 0               | 1                 |
| Multiple myeloma               | 0               | 1                 |
| Osteoporosis                   | 0               | 4                 |
| Overactive bladder             | 0               | 1                 |
| Periodontal disease            | 1               | 0                 |
| Pollinosis                     | 1               | 1                 |
| Reflux esophagitis             | 1               | 0                 |
| Sensitivity to cold            | 0               | 2                 |
| Sleep disorder                 | 0               | 1                 |
| Type 1 diabetes                | 0               | 1                 |
| Underweight                    | 0               | 1                 |

**Supplementary Table S2.** The male structural equation modeling output as shown in Figure 4a. NA, not available.

| lhs <sup>a</sup>              | op <sup>b</sup> | rhs <sup>c</sup>              | est.std <sup>d</sup> | se <sup>e</sup> | z <sup>f</sup> | p-value <sup>g</sup> | ci.lower <sup>h</sup> | ci.upper <sup>i</sup> |
|-------------------------------|-----------------|-------------------------------|----------------------|-----------------|----------------|----------------------|-----------------------|-----------------------|
| lv1                           | =~              | <i>Clostridium_XVIII</i>      | 0.57                 | 0.19            | 2.98           | <0.01                | 0.19                  | 0.94                  |
| lv1                           | =~              | <i>Rothia</i>                 | 0.66                 | 0.16            | 4.02           | <0.01                | 0.34                  | 0.98                  |
| lv1                           | =~              | <i>Streptococcus</i>          | 0.57                 | 0.18            | 3.23           | <0.01                | 0.22                  | 0.92                  |
| lv1                           | =~              | <i>Intestinibacter</i>        | 0.59                 | 0.20            | 3.02           | <0.01                | 0.21                  | 0.97                  |
| lv1                           | =~              | <i>Erysipelatoclostridium</i> | 0.61                 | 0.20            | 3.11           | <0.01                | 0.23                  | 1.00                  |
| lv1                           | =~              | <i>Eggerthella</i>            | 0.49                 | 0.17            | 2.82           | <0.01                | 0.15                  | 0.83                  |
| lv1                           | =~              | <i>Veillonella</i>            | 0.56                 | 0.19            | 3.03           | <0.01                | 0.20                  | 0.93                  |
| MCI                           | ~               | lv1                           | 0.69                 | 0.20            | 3.45           | <0.01                | 0.30                  | 1.08                  |
| <i>Clostridium_XVIII</i>      | ~~              | <i>Clostridium_XVIII</i>      | 0.68                 | 0.21            | 3.18           | <0.01                | 0.26                  | 1.10                  |
| <i>Rothia</i>                 | ~~              | <i>Rothia</i>                 | 0.57                 | 0.21            | 2.65           | 0.01                 | 0.15                  | 0.99                  |
| <i>Streptococcus</i>          | ~~              | <i>Streptococcus</i>          | 0.67                 | 0.20            | 3.34           | <0.01                | 0.28                  | 1.07                  |
| <i>Intestinibacter</i>        | ~~              | <i>Intestinibacter</i>        | 0.65                 | 0.23            | 2.82           | <0.01                | 0.20                  | 1.10                  |
| <i>Erysipelatoclostridium</i> | ~~              | <i>Erysipelatoclostridium</i> | 0.62                 | 0.24            | 2.56           | 0.01                 | 0.15                  | 1.10                  |
| <i>Eggerthella</i>            | ~~              | <i>Eggerthella</i>            | 0.76                 | 0.17            | 4.47           | <0.01                | 0.43                  | 1.09                  |
| <i>Veillonella</i>            | ~~              | <i>Veillonella</i>            | 0.68                 | 0.21            | 3.28           | <0.01                | 0.28                  | 1.09                  |
| MCI                           | ~~              | MCI                           | 0.52                 | 0.28            | 1.88           | 0.06                 | -0.02                 | 1.07                  |
| lv1                           | ~~              | lv1                           | 1.00                 | 0               | NA             | NA                   | 1                     | 1                     |
| <i>Clostridium_XVIII</i>      | ~1              |                               | <0.01                | 0.21            | <0.01          | 1.00                 | -0.41                 | 0.41                  |
| <i>Rothia</i>                 | ~1              |                               | <0.01                | 0.23            | <0.01          | 1.00                 | -0.45                 | 0.45                  |
| <i>Streptococcus</i>          | ~1              |                               | <0.01                | 0.21            | <0.01          | 1.00                 | -0.41                 | 0.41                  |
| <i>Intestinibacter</i>        | ~1              |                               | <0.01                | 0.20            | <0.01          | 1.00                 | -0.38                 | 0.38                  |
| <i>Erysipelatoclostridium</i> | ~1              |                               | <0.01                | 0.22            | <0.01          | 1.00                 | -0.43                 | 0.43                  |
| <i>Eggerthella</i>            | ~1              |                               | <0.01                | 0.20            | <0.01          | 1.00                 | -0.40                 | 0.40                  |
| <i>Veillonella</i>            | ~1              |                               | 0                    | 0.27            | 0              | 1.00                 | -0.52                 | 0.52                  |
| MCI                           | ~1              |                               | 0                    | 0               | NA             | NA                   | 0                     | 0                     |
| lv1                           | ~1              |                               | 0                    | 0               | NA             | NA                   | 0                     | 0                     |

<sup>a</sup> Variable name that appears on the left-hand side of the formula

<sup>b</sup> Operator indicates the following formula types: =~, latent variable definition; ~, regression; ~~ (residual) (co)variance; and ~1, intercept

<sup>c</sup> Variable name that appears on the right-hand side of the formula

<sup>d</sup> Standardized parameter estimates

<sup>e</sup> Standard error for each estimated parameter

<sup>f</sup> Z-value

<sup>g</sup> p-value for testing the null hypothesis that the parameter value equals zero in the population

<sup>h</sup> Lower 95% confidence intervals for standardized parameters

<sup>i</sup> Upper 95% confidence intervals for standardized parameters

**Supplementary Table S3.** The female structural equation modeling output as shown in Figure 4b. NA, not available.

| lhs <sup>a</sup>              | op <sup>b</sup> | rhs <sup>c</sup>              | est.std <sup>d</sup> | se <sup>e</sup> | z <sup>f</sup> | p-value <sup>g</sup> | ci.lower <sup>h</sup> | ci.upper <sup>i</sup> |
|-------------------------------|-----------------|-------------------------------|----------------------|-----------------|----------------|----------------------|-----------------------|-----------------------|
| lv1                           | =~              | <i>Ruthenibacterium</i>       | 0.65                 | 0.13            | 4.92           | <0.01                | 0.39                  | 0.90                  |
| lv1                           | =~              | <i>Enterocloster</i>          | 0.80                 | 0.09            | 9.34           | <0.01                | 0.63                  | 0.96                  |
| lv1                           | =~              | <i>Erysipelatoclostridium</i> | 0.71                 | 0.11            | 6.67           | <0.01                | 0.50                  | 0.92                  |
| lv1                           | =~              | <i>Flavonifractor</i>         | 0.77                 | 0.11            | 6.83           | <0.01                | 0.55                  | 0.99                  |
| lv1                           | =~              | <i>Dysosmobacter</i>          | 0.62                 | 0.14            | 4.53           | <0.01                | 0.35                  | 0.88                  |
| lv1                           | =~              | <i>Eggerthella</i>            | 0.74                 | 0.14            | 5.42           | <0.01                | 0.47                  | 1.00                  |
| lv1                           | =~              | <i>Sellimonas</i>             | 0.58                 | 0.15            | 4.00           | <0.01                | 0.30                  | 0.87                  |
| lv1                           | =~              | <i>Bacteroides</i>            | 0.73                 | 0.10            | 7.59           | <0.01                | 0.54                  | 0.91                  |
| lv2                           | =~              | <i>Veillonella</i>            | 0.57                 | 0.18            | 3.12           | <0.01                | 0.21                  | 0.94                  |
| lv2                           | =~              | <i>Ligilactobacillus</i>      | 0.48                 | 0.25            | 1.96           | 0.05                 | <0.01                 | 0.96                  |
| lv2                           | =~              | <i>Megamonas</i>              | 0.85                 | 0.25            | 3.40           | <0.01                | 0.36                  | 1.34                  |
| MCI                           | ~               | lv1                           | 0.52                 | 0.18            | 2.94           | <0.01                | 0.17                  | 0.87                  |
| MCI                           | ~               | lv2                           | -0.52                | 0.22            | -2.36          | 0.02                 | -0.95                 | -0.09                 |
| <i>Ruthenibacterium</i>       | ~~              | <i>Ruthenibacterium</i>       | 0.58                 | 0.17            | 3.43           | <0.01                | 0.25                  | 0.92                  |
| <i>Enterocloster</i>          | ~~              | <i>Enterocloster</i>          | 0.36                 | 0.14            | 2.68           | 0.01                 | 0.10                  | 0.63                  |
| <i>Erysipelatoclostridium</i> | ~~              | <i>Erysipelatoclostridium</i> | 0.49                 | 0.15            | 3.20           | <0.01                | 0.19                  | 0.79                  |
| <i>Flavonifractor</i>         | ~~              | <i>Flavonifractor</i>         | 0.41                 | 0.17            | 2.33           | 0.02                 | 0.06                  | 0.75                  |
| <i>Dysosmobacter</i>          | ~~              | <i>Dysosmobacter</i>          | 0.62                 | 0.17            | 3.69           | <0.01                | 0.29                  | 0.95                  |
| <i>Eggerthella</i>            | ~~              | <i>Eggerthella</i>            | 0.46                 | 0.20            | 2.31           | 0.02                 | 0.07                  | 0.85                  |
| <i>Sellimonas</i>             | ~~              | <i>Sellimonas</i>             | 0.66                 | 0.17            | 3.89           | <0.01                | 0.33                  | 0.99                  |
| <i>Bacteroides</i>            | ~~              | <i>Bacteroides</i>            | 0.47                 | 0.14            | 3.38           | <0.01                | 0.20                  | 0.74                  |
| <i>Veillonella</i>            | ~~              | <i>Veillonella</i>            | 0.67                 | 0.21            | 3.16           | <0.01                | 0.25                  | 1.08                  |
| <i>Ligilactobacillus</i>      | ~~              | <i>Ligilactobacillus</i>      | 0.77                 | 0.24            | 3.26           | <0.01                | 0.31                  | 1.23                  |
| <i>Megamonas</i>              | ~~              | <i>Megamonas</i>              | 0.28                 | 0.42            | 0.67           | 0.51                 | -0.55                 | 1.11                  |
| MCI                           | ~~              | MCI                           | 0.24                 | 0.20            | 1.15           | 0.25                 | -0.17                 | 0.64                  |
| lv1                           | ~~              | lv1                           | 1.00                 | 0               | NA             | NA                   | 1.00                  | 1.00                  |
| lv2                           | ~~              | lv2                           | 1.00                 | 0               | NA             | NA                   | 1.00                  | 1.00                  |
| lv1                           | ~~              | lv2                           | -0.41                | 0.17            | -2.40          | 0.02                 | -0.75                 | -0.08                 |
| <i>Ruthenibacterium</i>       | ~1              |                               | <0.01                | 0.17            | <0.01          | 1.00                 | -0.33                 | 0.33                  |
| <i>Enterocloster</i>          | ~1              |                               | <0.01                | 0.16            | <0.01          | 1.00                 | -0.31                 | 0.31                  |
| <i>Erysipelatoclostridium</i> | ~1              |                               | <0.01                | 0.16            | <0.01          | 1.00                 | -0.31                 | 0.31                  |
| <i>Flavonifractor</i>         | ~1              |                               | <0.01                | 0.16            | <0.01          | 1.00                 | -0.31                 | 0.31                  |
| <i>Dysosmobacter</i>          | ~1              |                               | <0.01                | 0.17            | <0.01          | 1.00                 | -0.34                 | 0.34                  |
| <i>Eggerthella</i>            | ~1              |                               | <0.01                | 0.17            | <0.01          | 1.00                 | -0.33                 | 0.33                  |
| <i>Sellimonas</i>             | ~1              |                               | <0.01                | 0.24            | <0.01          | 1.00                 | -0.47                 | 0.47                  |
| <i>Bacteroides</i>            | ~1              |                               | <0.01                | 0.19            | <0.01          | 1.00                 | -0.38                 | 0.38                  |
| <i>Veillonella</i>            | ~1              |                               | <0.01                | 0.17            | <0.01          | 1.00                 | -0.34                 | 0.34                  |
| <i>Ligilactobacillus</i>      | ~1              |                               | <0.01                | 0.32            | <0.01          | 1.00                 | -0.64                 | 0.64                  |
| <i>Megamonas</i>              | ~1              |                               | <0.01                | 0.52            | <0.01          | 1.00                 | -1.02                 | 1.02                  |
| MCI                           | ~1              |                               | 0                    | 0               | NA             | NA                   | 0                     | 0                     |
| lv1                           | ~1              |                               | 0                    | 0               | NA             | NA                   | 0                     | 0                     |
| lv2                           | ~1              |                               | 0                    | 0               | NA             | NA                   | 0                     | 0                     |

<sup>a</sup> Variable name that appears on the left-hand side of the formula

<sup>b</sup> Operator indicates the following formula types: =~, latent variable definition; ~, regression; ~~ (residual) (co)variance; and ~1, intercept

<sup>c</sup> Variable name that appears on the right-hand side of the formula

<sup>d</sup> Standardized parameter estimates

<sup>e</sup> Standard error for each estimated parameter

<sup>f</sup> Z-value

<sup>g</sup>  $p$ -value for testing the null hypothesis that the parameter value equals zero in the population

<sup>h</sup> Lower 95% confidence intervals for standardized parameters

<sup>i</sup> Upper 95% confidence intervals for standardized parameters

**Supplementary Table S4.** The male structural equation modeling output as shown in Supplementary Figure S1. NA, not available.

| lhs <sup>a</sup>              | op <sup>b</sup> | rhs <sup>c</sup>              | est.std <sup>d</sup> | se <sup>e</sup> | z <sup>f</sup> | p-value <sup>g</sup> | ci.lower <sup>h</sup> | ci.upper <sup>i</sup> |
|-------------------------------|-----------------|-------------------------------|----------------------|-----------------|----------------|----------------------|-----------------------|-----------------------|
| lv1                           | =~              | <i>Clostridium_XVIII</i>      | 0.60                 | 0.18            | 3.35           | <0.01                | 0.25                  | 0.95                  |
| lv1                           | =~              | <i>Rothia</i>                 | 0.62                 | 0.16            | 3.84           | <0.01                | 0.31                  | 0.94                  |
| lv1                           | =~              | <i>Streptococcus</i>          | 0.52                 | 0.19            | 2.76           | 0.01                 | 0.15                  | 0.88                  |
| lv1                           | =~              | <i>Intestinibacter</i>        | 0.59                 | 0.19            | 3.17           | <0.01                | 0.23                  | 0.96                  |
| lv1                           | =~              | <i>Erysipelatoclostridium</i> | 0.64                 | 0.20            | 3.24           | <0.01                | 0.25                  | 1.02                  |
| lv1                           | =~              | <i>Eggerthella</i>            | 0.47                 | 0.17            | 2.77           | 0.01                 | 0.14                  | 0.81                  |
| lv1                           | =~              | <i>Veillonella</i>            | 0.64                 | 0.18            | 3.64           | <0.01                | 0.29                  | 0.98                  |
| lv2                           | =~              | <i>Ruminococcus</i>           | 0.84                 | 0.33            | 2.58           | 0.01                 | 0.20                  | 1.48                  |
| lv2                           | =~              | <i>Oscillibacter</i>          | 0.45                 | 0.18            | 2.54           | 0.01                 | 0.10                  | 0.79                  |
| MCI                           | ~               | lv1                           | 0.78                 | 1.05            | 0.74           | 0.46                 | -1.28                 | 2.83                  |
| MCI                           | ~               | lv2                           | 0.12                 | 1.09            | 0.11           | 0.91                 | -2.02                 | 2.26                  |
| <i>Clostridium_XVIII</i>      | ~~              | <i>Clostridium_XVIII</i>      | 0.64                 | 0.22            | 2.97           | <0.01                | 0.22                  | 1.06                  |
| <i>Rothia</i>                 | ~~              | <i>Rothia</i>                 | 0.61                 | 0.20            | 3.00           | <0.01                | 0.21                  | 1.01                  |
| <i>Streptococcus</i>          | ~~              | <i>Streptococcus</i>          | 0.73                 | 0.19            | 3.81           | <0.01                | 0.36                  | 1.11                  |
| <i>Intestinibacter</i>        | ~~              | <i>Intestinibacter</i>        | 0.65                 | 0.22            | 2.93           | <0.01                | 0.21                  | 1.08                  |
| <i>Erysipelatoclostridium</i> | ~~              | <i>Erysipelatoclostridium</i> | 0.59                 | 0.25            | 2.36           | 0.02                 | 0.10                  | 1.09                  |
| <i>Eggerthella</i>            | ~~              | <i>Eggerthella</i>            | 0.78                 | 0.16            | 4.81           | <0.01                | 0.46                  | 1.09                  |
| <i>Veillonella</i>            | ~~              | <i>Veillonella</i>            | 0.59                 | 0.22            | 2.65           | 0.01                 | 0.15                  | 1.03                  |
| <i>Ruminococcus</i>           | ~~              | <i>Ruminococcus</i>           | 0.29                 | 0.55            | 0.54           | 0.59                 | -0.78                 | 1.37                  |
| <i>Oscillibacter</i>          | ~~              | <i>Oscillibacter</i>          | 0.80                 | 0.16            | 5.13           | <0.01                | 0.50                  | 1.11                  |
| MCI                           | ~~              | MCI                           | 0.54                 | 0.30            | 1.81           | 0.07                 | -0.04                 | 1.13                  |
| lv1                           | ~~              | lv1                           | 1.00                 | 0               | NA             | NA                   | 1.00                  | 1.00                  |
| lv2                           | ~~              | lv2                           | 1.00                 | 0               | NA             | NA                   | 1.00                  | 1.00                  |
| lv1                           | ~~              | lv2                           | -0.87                | 0.16            | -5.44          | <0.01                | -1.18                 | -0.56                 |
| <i>Clostridium_XVIII</i>      | ~1              |                               | <0.01                | 0.21            | <0.01          | 1.00                 | -0.41                 | 0.41                  |
| <i>Rothia</i>                 | ~1              |                               | <0.01                | 0.23            | <0.01          | 1.00                 | -0.45                 | 0.45                  |
| <i>Streptococcus</i>          | ~1              |                               | <0.01                | 0.21            | <0.01          | 1.00                 | -0.41                 | 0.41                  |
| <i>Intestinibacter</i>        | ~1              |                               | <0.01                | 0.20            | <0.01          | 1.00                 | -0.38                 | 0.38                  |
| <i>Erysipelatoclostridium</i> | ~1              |                               | <0.01                | 0.22            | <0.01          | 1.00                 | -0.43                 | 0.43                  |
| <i>Eggerthella</i>            | ~1              |                               | <0.01                | 0.20            | <0.01          | 1.00                 | -0.40                 | 0.40                  |
| <i>Veillonella</i>            | ~1              |                               | 0                    | 0.27            | 0              | 1.00                 | -0.52                 | 0.52                  |
| <i>Ruminococcus</i>           | ~1              |                               | <0.01                | 0.21            | <0.01          | 1.00                 | -0.41                 | 0.41                  |
| <i>Oscillibacter</i>          | ~1              |                               | 0                    | 0.21            | 0              | 1.00                 | -0.41                 | 0.41                  |
| MCI                           | ~1              |                               | 0                    | 0               | NA             | NA                   | 0                     | 0                     |
| lv1                           | ~1              |                               | 0                    | 0               | NA             | NA                   | 0                     | 0                     |
| lv2                           | ~1              |                               | 0                    | 0               | NA             | NA                   | 0                     | 0                     |

<sup>a</sup> Variable name that appears on the left-hand side of the formula

<sup>b</sup> Operator indicates the following formula types: =~, latent variable definition; ~, regression; ~~ (residual) (co)variance; and ~1, intercept

<sup>c</sup> Variable name that appears on the right-hand side of the formula

<sup>d</sup> Standardized parameter estimates

<sup>e</sup> Standard error for each estimated parameter

<sup>f</sup> Z-value

<sup>g</sup> p-value for testing the null hypothesis that the parameter value equals zero in the population

<sup>h</sup> Lower 95% confidence intervals for standardized parameters

<sup>i</sup> Upper 95% confidence intervals for standardized parameters
